# Supplementary material for: Ruthenium(ii)-diphosphine complexes containing acylthiourea ligands are effective against lung and breast cancers
Source: Royal Society of Chemistry journal article supplement (doi:10.1039/d1dt02851k), 2021-12-15
Supplement: d1dt02851k1.pdf [file d1dt02851k1.pdf]

## **Ruthenium(II)-Diphosphine Complexes Containing Acylthiourea Ligands are Effective Against Lung and Breast Cancer**

Gregory F. Grawe<sup>a</sup>, Katia M. Oliveira<sup>b\*</sup>, Celisnolia M. Leite<sup>a</sup>, Tamires D. de Oliveira<sup>a</sup>,  
João Honorato<sup>a</sup>, Antonio G. Ferreira<sup>a</sup>, Eduardo E. Castellano<sup>c</sup>, Marcia R. Cominetti<sup>d</sup>,  
Rodrigo S. Correa<sup>b</sup>, Alzir A. Batista<sup>a,e\*</sup>

<sup>a</sup>*Departamento de Química, Universidade Federal de São Carlos – UFSCar, CP 676,  
CEP 13561-901, São Carlos, SP, Brazil*

<sup>b</sup>*Departamento de Química, ICEB, Universidade Federal de Ouro Preto (UFOP), CEP  
35400-000, Ouro Preto – MG, Brazil*

<sup>c</sup>*Instituto de Física de São Carlos, Universidade de São Paulo – USP, CP 369, CEP  
13560-970 São Carlos, SP, Brazil;*

<sup>d</sup>*Departamento de Gerontologia, Universidade Federal de São Carlos (UFSCar), CP  
676, CEP 13565-905, São Carlos – SP, Brazil*

<sup>e</sup>*Instituto de Química, Universidade Federal de Goiás – UFG, CEP 74690-900, Goiânia,  
GO, Brazil.*

\* Corresponding authors: e-mail: [kmoliveiraq@gmail.com](mailto:kmoliveiraq@gmail.com) (K. M. Oliveira) and  
[daab@ufscar.br](mailto:daab@ufscar.br) (Alzir A. Batista). Tel.: +55 16 33518285; Fax: +55 16 33518350.

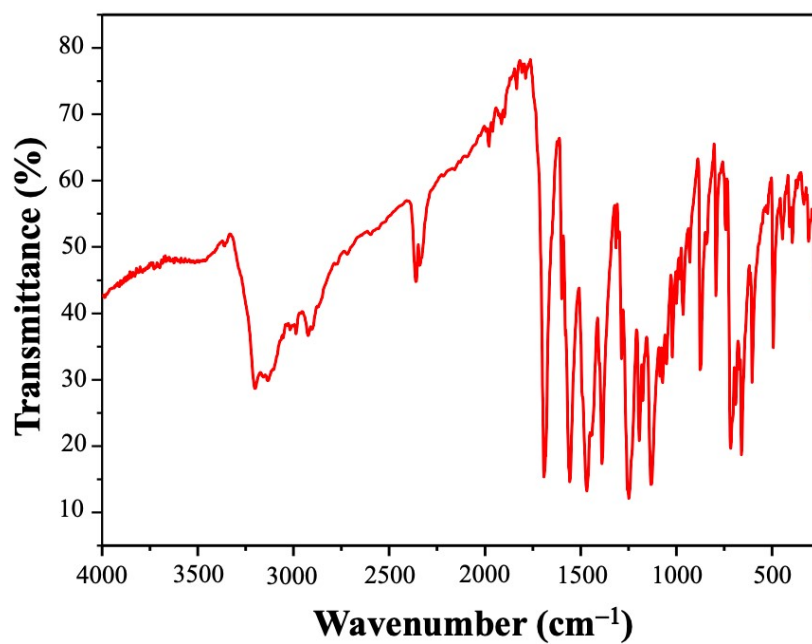

**Figure S1.** Infrared spectrum of the free *N,N*-dimethyl-*N'*-(benzoyl)thiourea in KBr pellets.

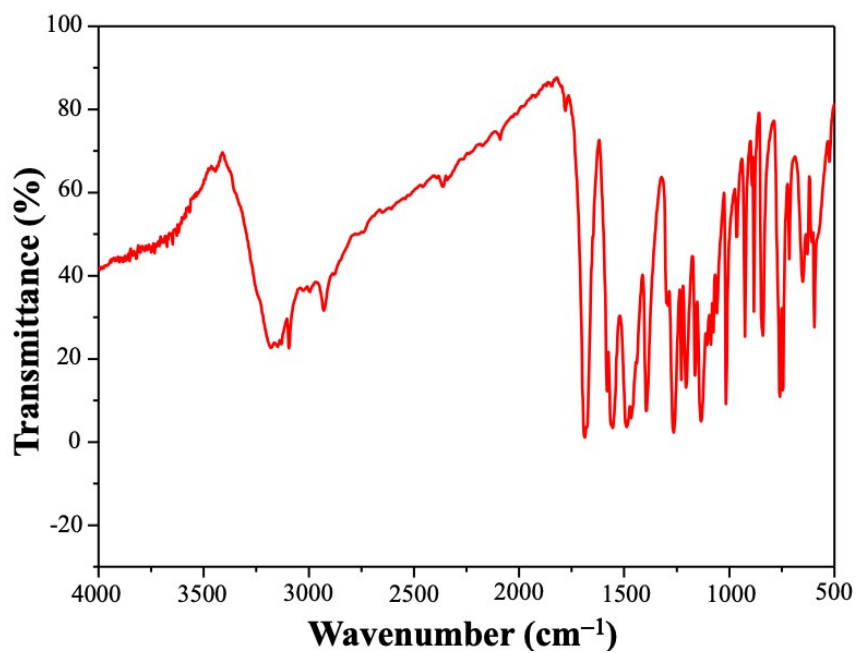

**Figure S2.** Infrared spectrum of the free *N,N*-dimethyl-*N'*-(furoyl)thiourea in KBr pellets.

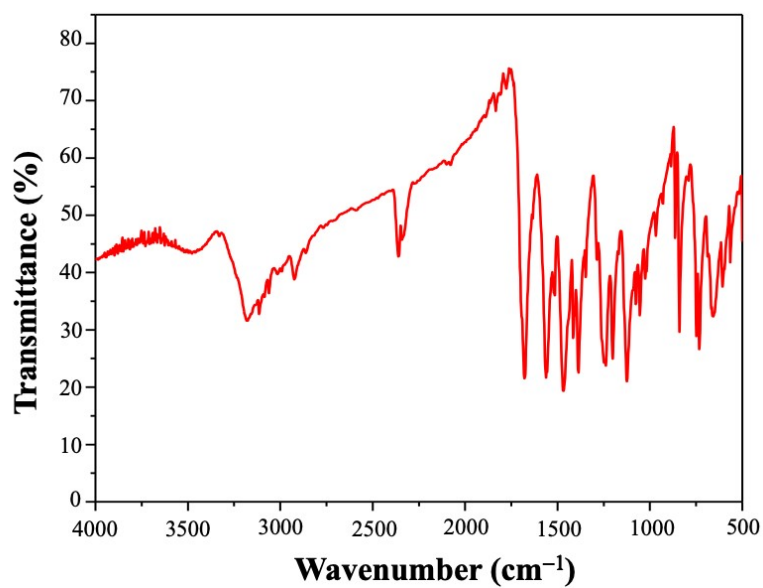

**Figure S3.** Infrared spectrum of the free *N,N*-dimethyl-*N'*-(thiophenyl)thiourea in KBr pellets.

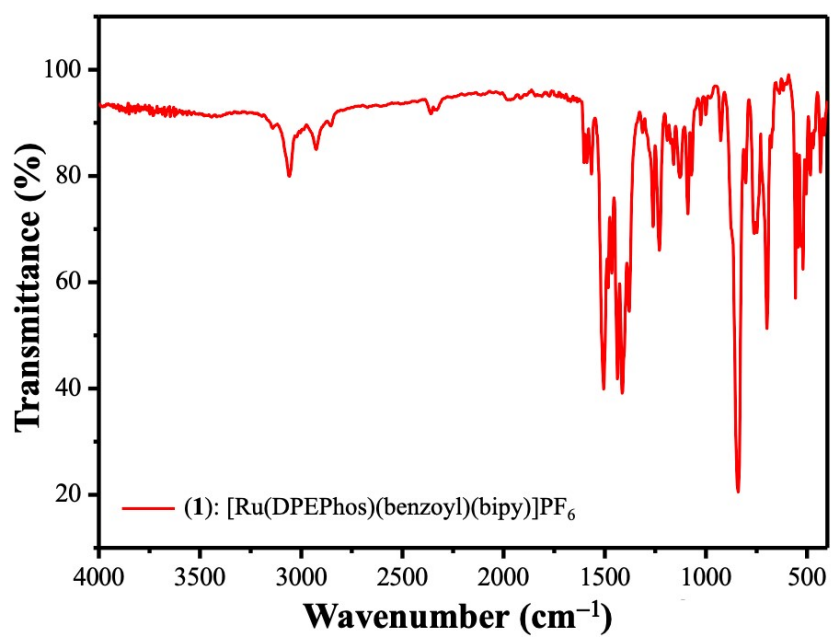

**Figure S4.** Infrared spectrum of the complex (1) in KBr pellets.

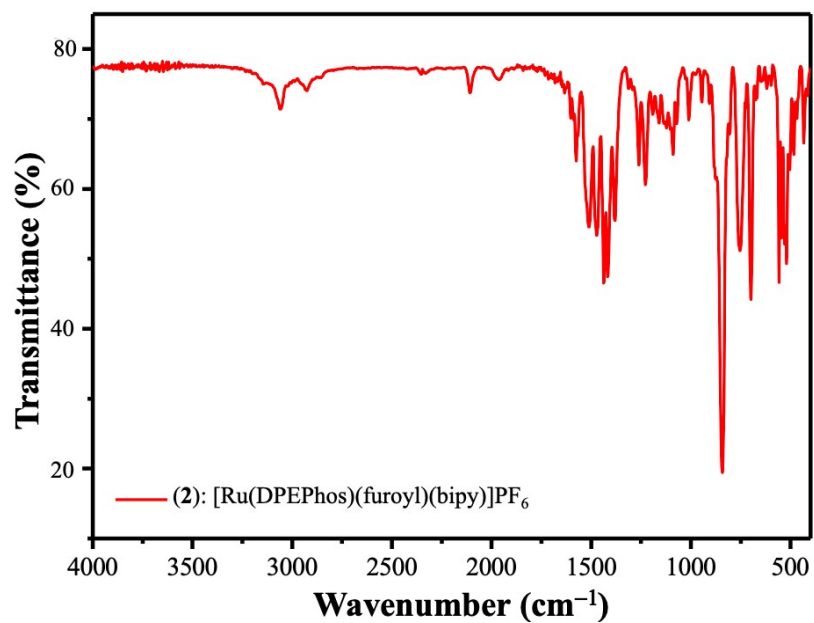

**Figure S5.** Infrared spectrum of the complex (2) in KBr pellets.

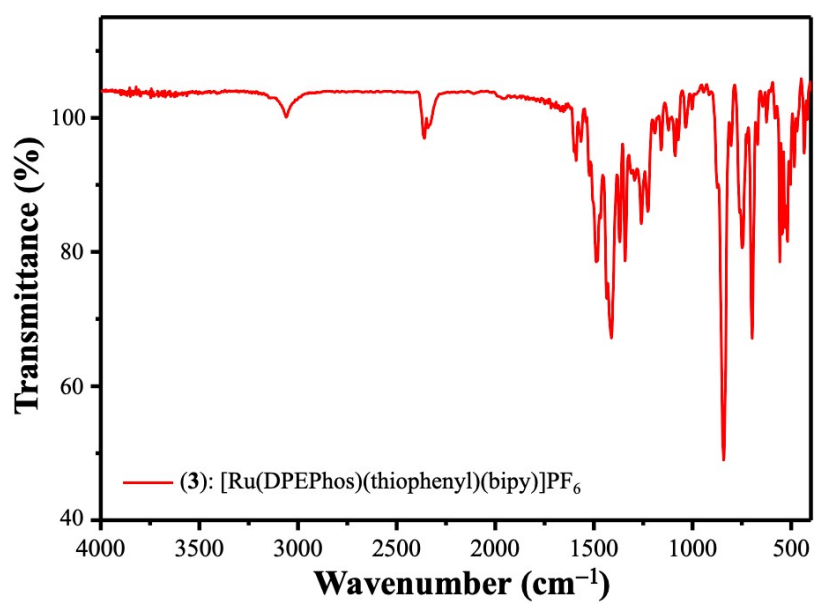

**Figure S6.** Infrared spectrum of the complex (3) in KBr pellets.

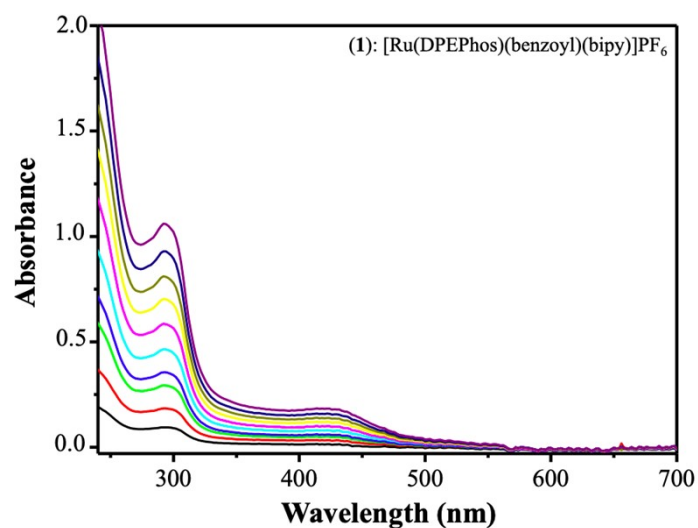

Figure S7. UV-vis spectra of the complex (1) in  $\text{CH}_2\text{Cl}_2$ .

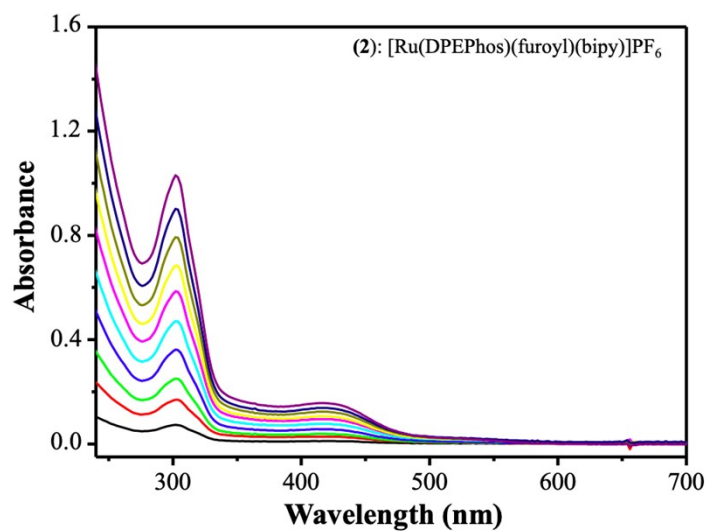

Figure S8. UV-vis spectra of the complex (2) in  $\text{CH}_2\text{Cl}_2$ .

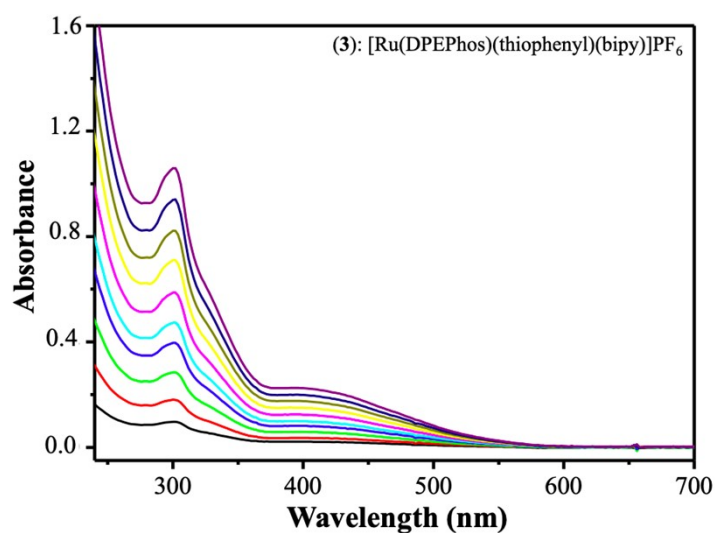

Figure S9. UV-vis spectra of the complex (3) in  $\text{CH}_2\text{Cl}_2$ .

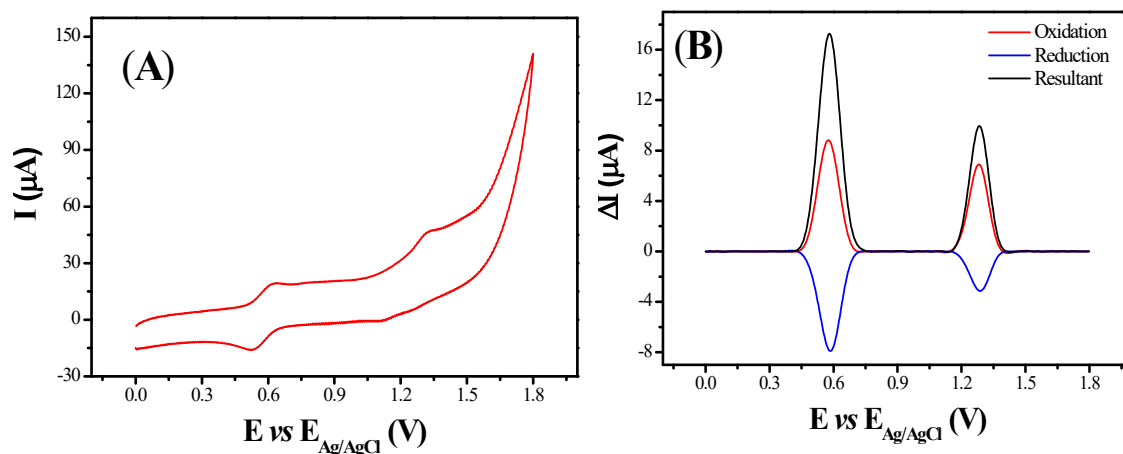

**Figure S10.** (A) Cyclic voltammogram and (B) square wave voltammogram of *cis*-[RuCl<sub>2</sub>(DPEPhos)(bipy)],  $1.0 \times 10^{-3}$  mol L<sup>-1</sup> in CH<sub>2</sub>Cl<sub>2</sub> (TBAP 0.1 mol L<sup>-1</sup>).  $V = 50$  mV s<sup>-1</sup>;  $f = 50$  Hz;  $\Delta E = 50$  mV;  $E_{\text{step}} = 2.0$  mV.

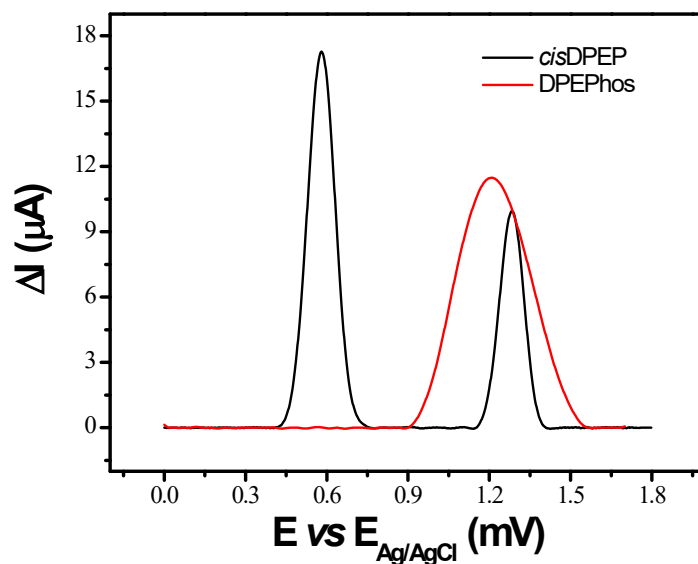

**Figure S11.** Square wave voltammogram of (—) *cis*-[RuCl<sub>2</sub>(DPEPhos)(bipy)] and (—) DPEPhos free, both at  $1.0 \times 10^{-3}$  mol L<sup>-1</sup>, in CH<sub>2</sub>Cl<sub>2</sub> (TBAP 0.1 mol L<sup>-1</sup>).  $f = 50$  Hz;  $\Delta E = 50$  mV;  $E_{\text{step}} = 2.0$  mV.

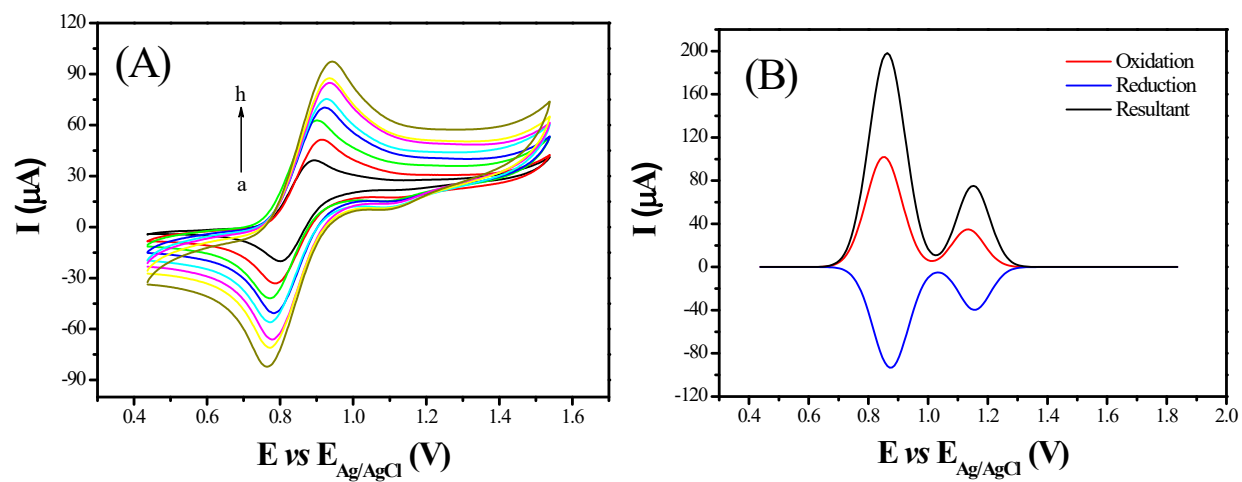

**Figure S12.** (A) Cyclic voltammogram ( $V = 20 - 200 \text{ mV s}^{-1}$ ) and (B) square wave voltammogram of complex (2),  $1.0 \times 10^{-3} \text{ mol L}^{-1}$ , in  $\text{CH}_2\text{Cl}_2$  (TBAP  $0.1 \text{ mol L}^{-1}$ ).

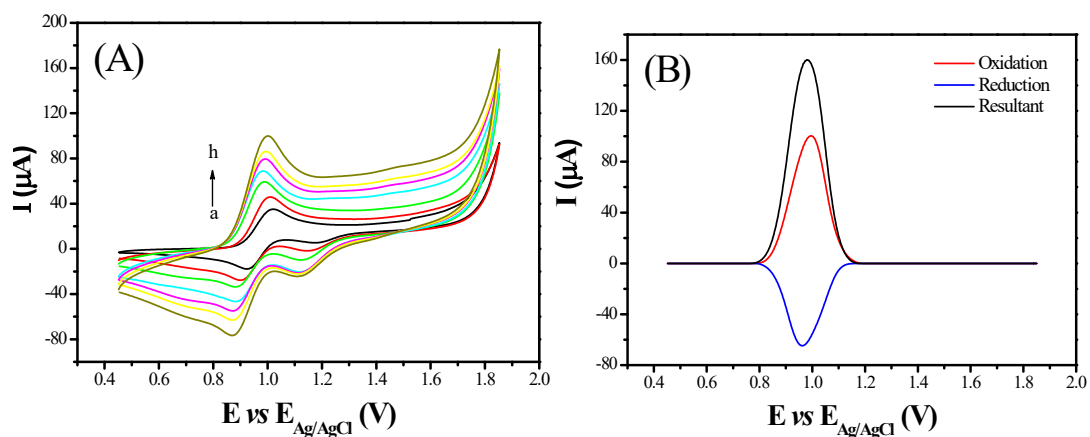

**Figure S13.** (A) Cyclic voltammogram ( $V = 20 - 200 \text{ mV s}^{-1}$ ) and (B) square wave voltammogram of complex (3),  $1.0 \times 10^{-3} \text{ mol L}^{-1}$ , in  $\text{CH}_2\text{Cl}_2$  (TBAP  $0.1 \text{ mol L}^{-1}$ ).

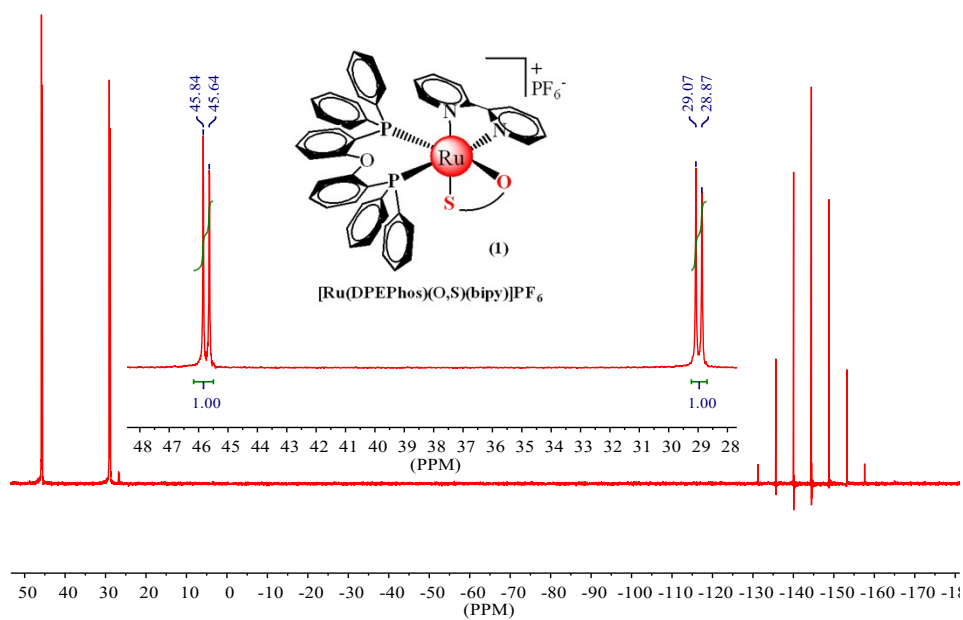

**Figure S14.**  $^{31}\text{P}\{^1\text{H}\}$  NMR spectrum of complex (1) in  $\text{CD}_2\text{Cl}_2$ .



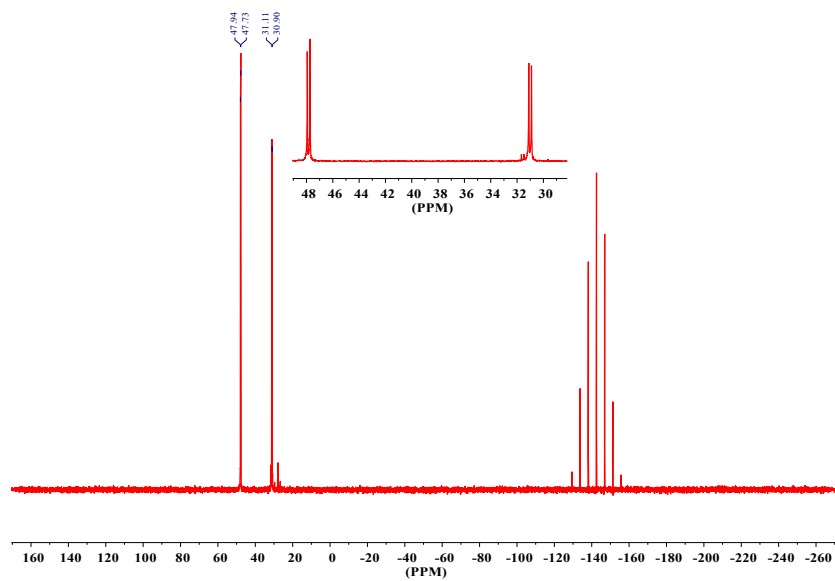

**Figure S15.**  $^{31}\text{P}\{^1\text{H}\}$  NMR spectrum of complex (2) in  $\text{CD}_2\text{Cl}_2$ .

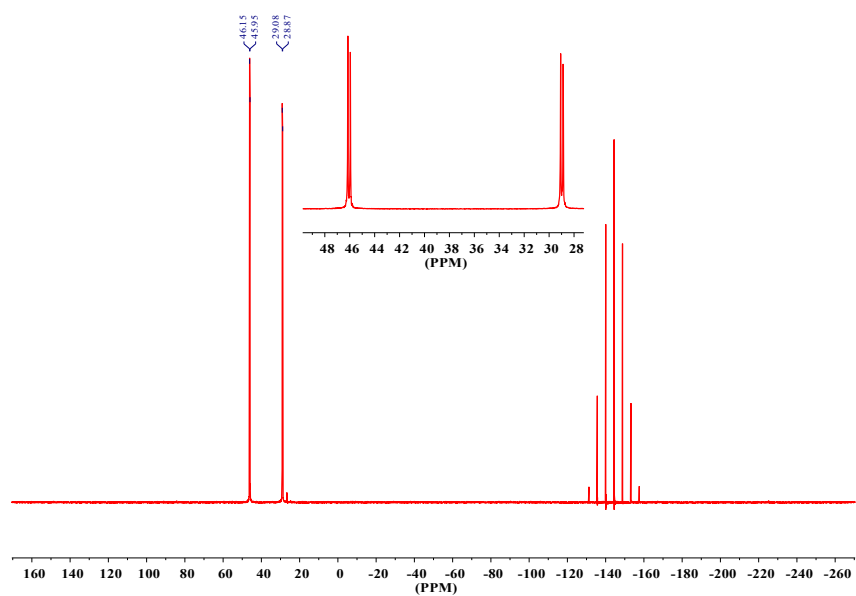

**Figure S16.**  $^{31}\text{P}\{^1\text{H}\}$  NMR spectrum of complex (3) in  $\text{CD}_2\text{Cl}_2$ .

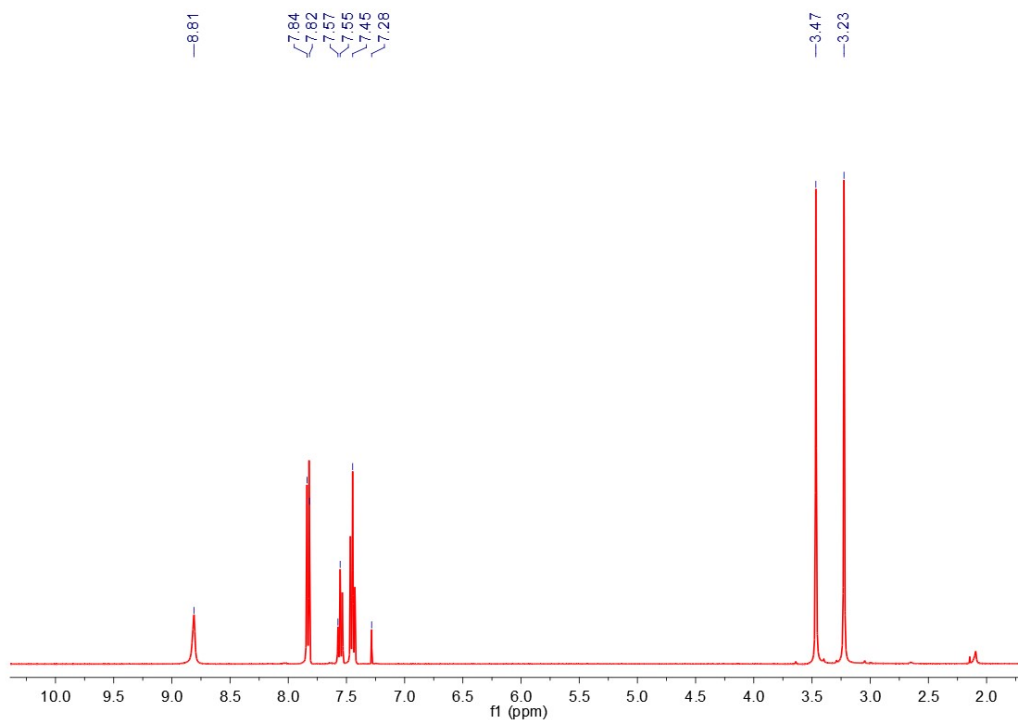

**Figure S17.**  $^1\text{H}$  NMR spectrum of free *N,N*-dimethyl-*N'*-(benzoyl)thiourea in  $\text{CDCl}_3$ .

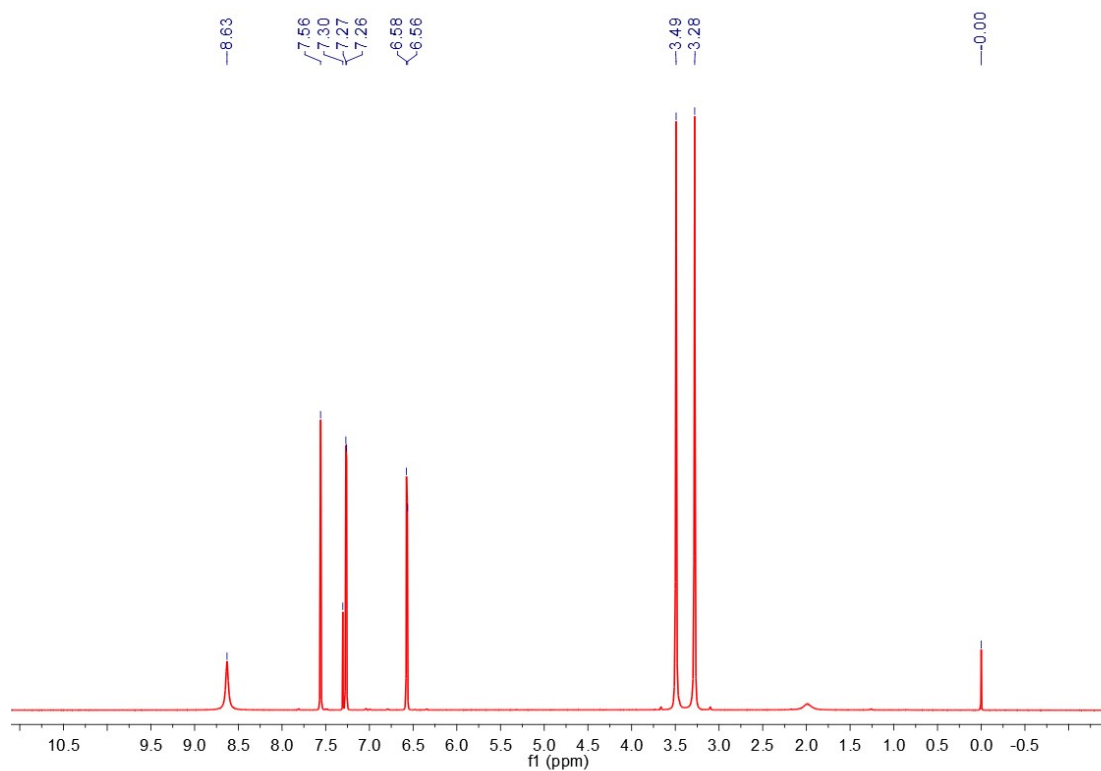

**Figure S18.**  $^1\text{H}$  NMR spectrum of free *N,N*-dimethyl-*N'*-(furoyl)thiourea in  $\text{CDCl}_3$ .

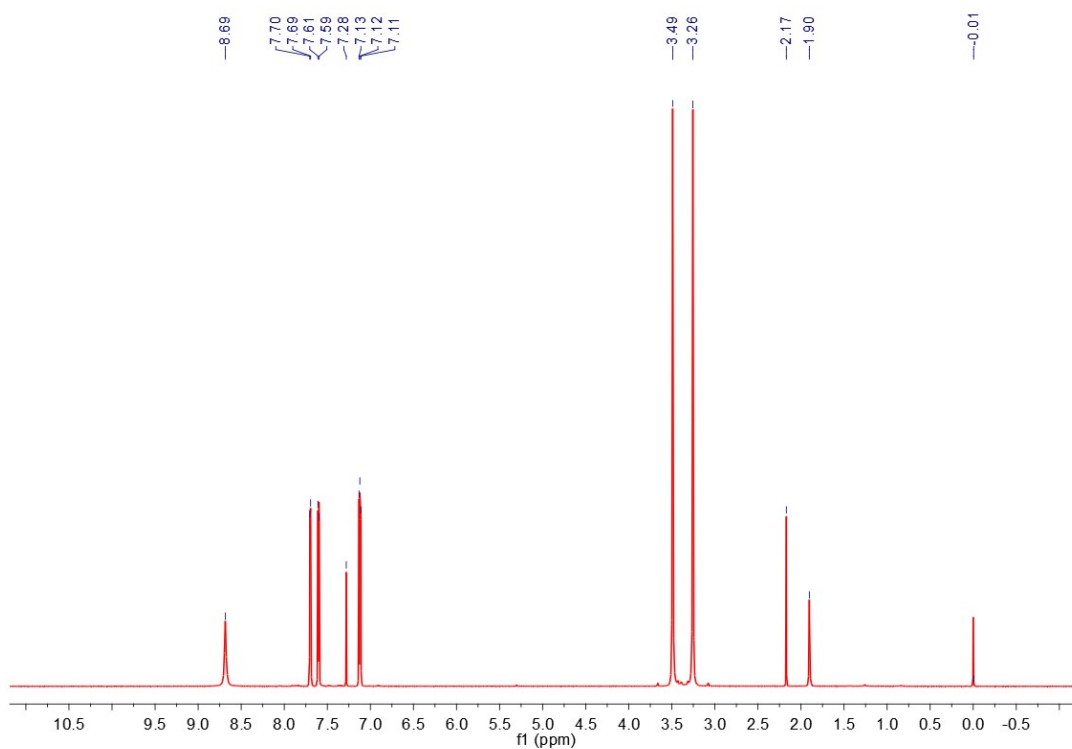

**Figure S19.**  $^1\text{H}$  NMR spectrum of free *N,N*-dimethyl-*N'*-(thiophenyl)thiourea in  $\text{CDCl}_3$ .

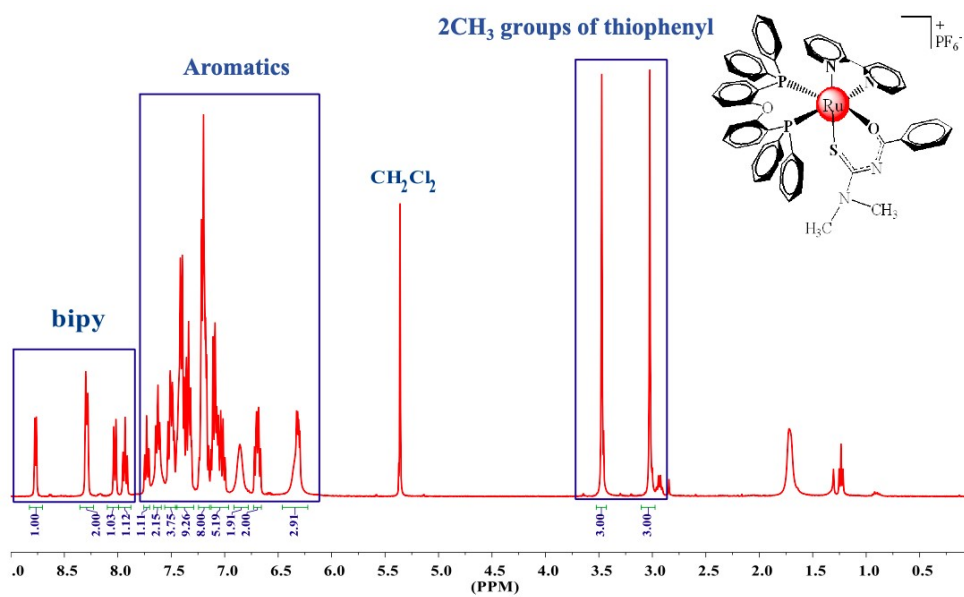

**Figure S20.**  $^1\text{H}$  NMR spectrum of complex (**1**) in  $\text{CD}_2\text{Cl}_2$ .

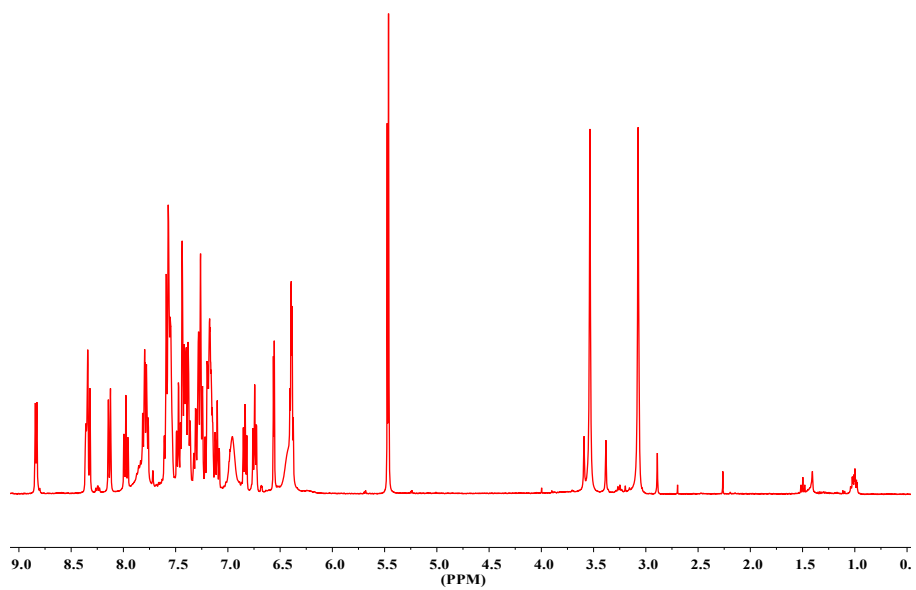

**Figure S21.**  $^1\text{H}$  NMR spectrum of complex **(2)** in  $\text{CD}_2\text{Cl}_2$ .

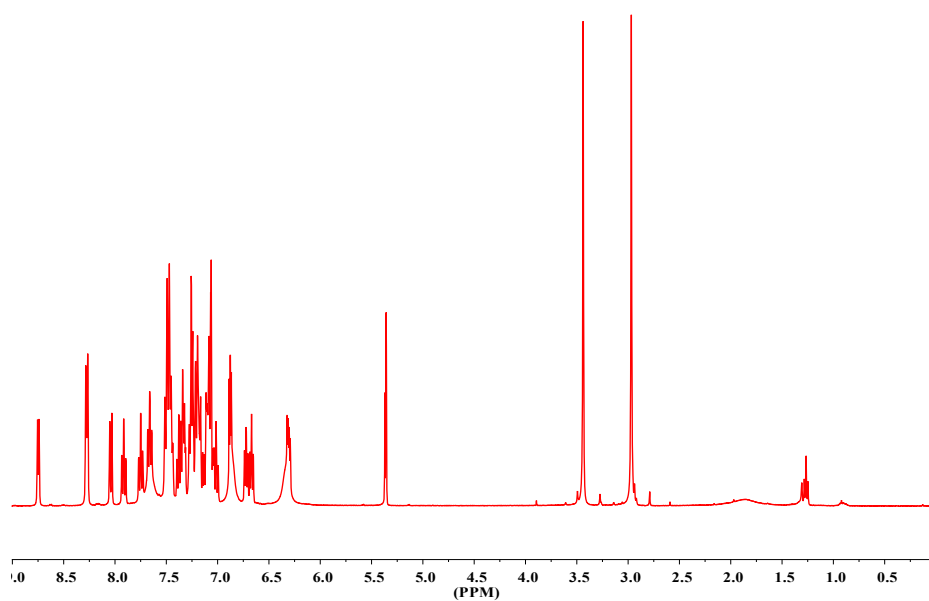

**Figure S22.**  $^1\text{H}$  NMR spectrum of complex **(3)** in  $\text{CD}_2\text{Cl}_2$ .

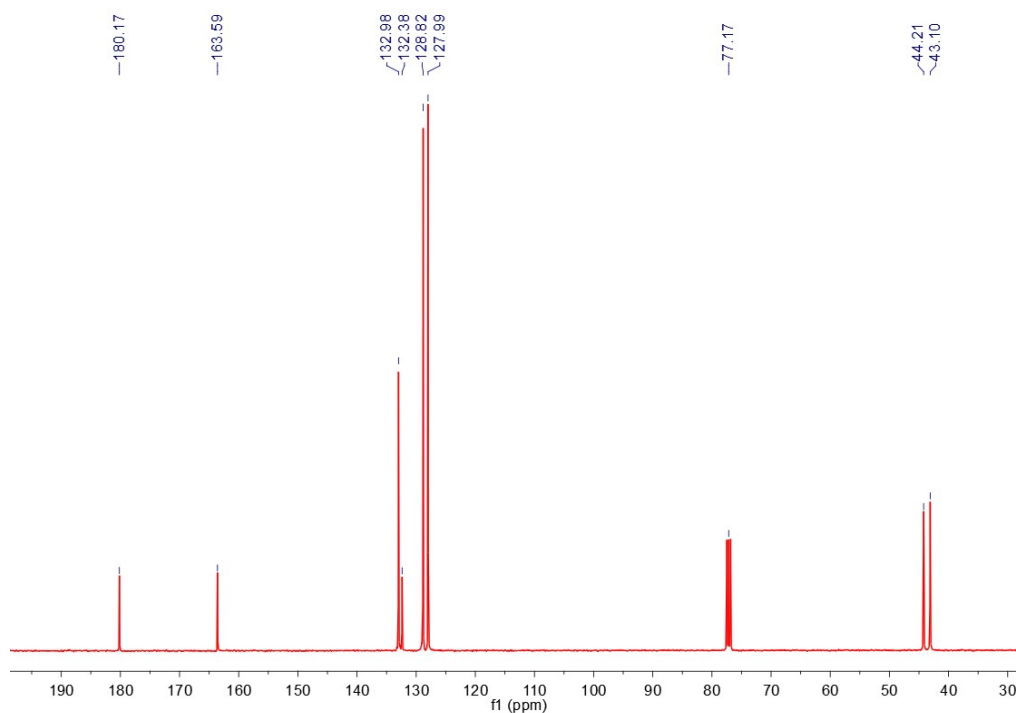

**Figure S23.**  $^{13}\text{C}$  NMR spectrum of free *N,N*-dimethyl-*N'*-(benzoyl)thiourea in  $\text{CDCl}_3$ .

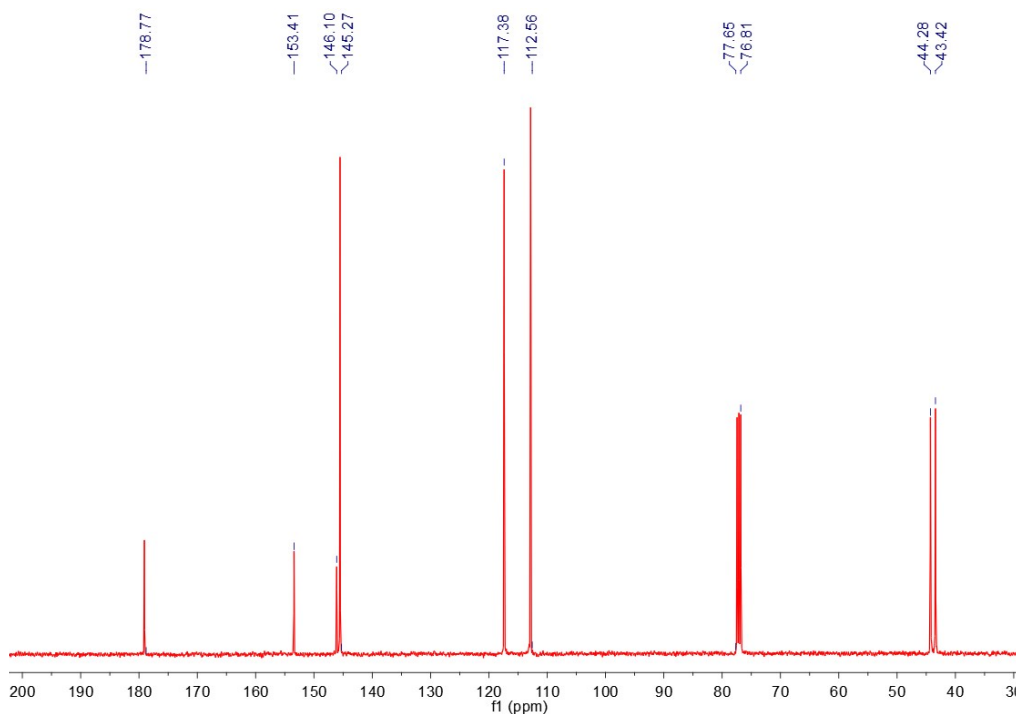

**Figure S24.**  $^{13}\text{C}$  NMR spectrum of free *N,N*-dimethyl-*N'*-(furoyl)thiourea in  $\text{CDCl}_3$ .

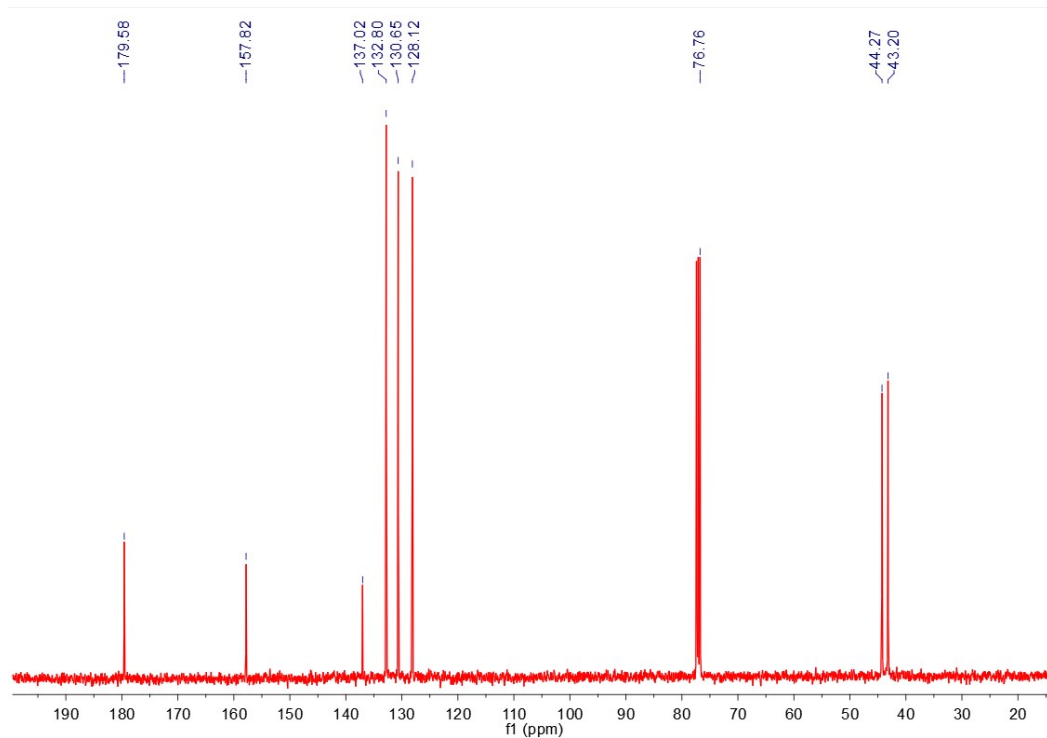

**Figure S25.**  $^{13}\text{C}$  NMR spectrum of free *N,N*-dimethyl-*N'*-(thiophenyl)thiourea in  $\text{CDCl}_3$ .

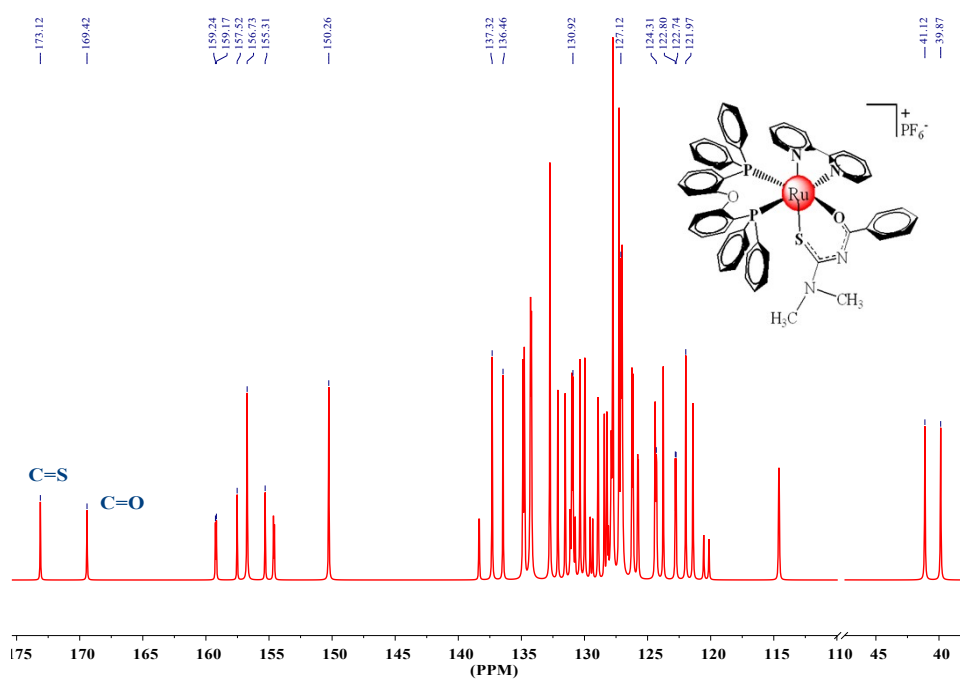

**Figure S26.**  $^{13}\text{C}\{^1\text{H}\}$  NMR of complex (**1**) in  $\text{CD}_2\text{Cl}_2$ .

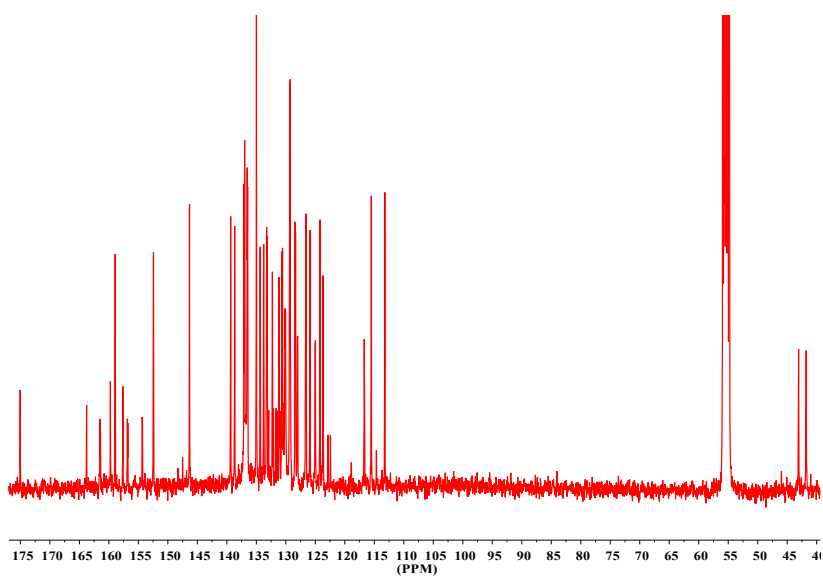

**Figure S27.**  $^{13}\text{C}\{^1\text{H}\}$  NMR spectrum of complex **(2)** in  $\text{CD}_2\text{Cl}_2$ .

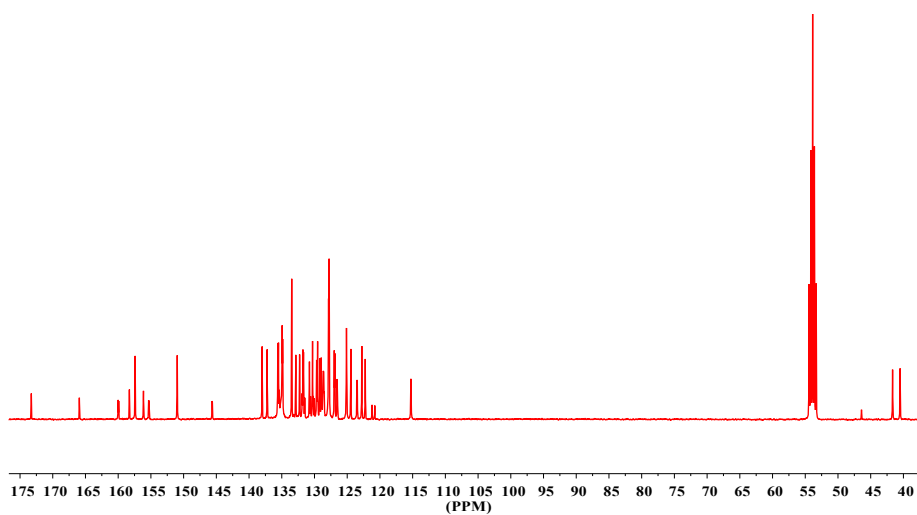

**Figure S28.**  $^{13}\text{C}\{^1\text{H}\}$  NMR spectrum of complex **(3)** in  $\text{CD}_2\text{Cl}_2$ .

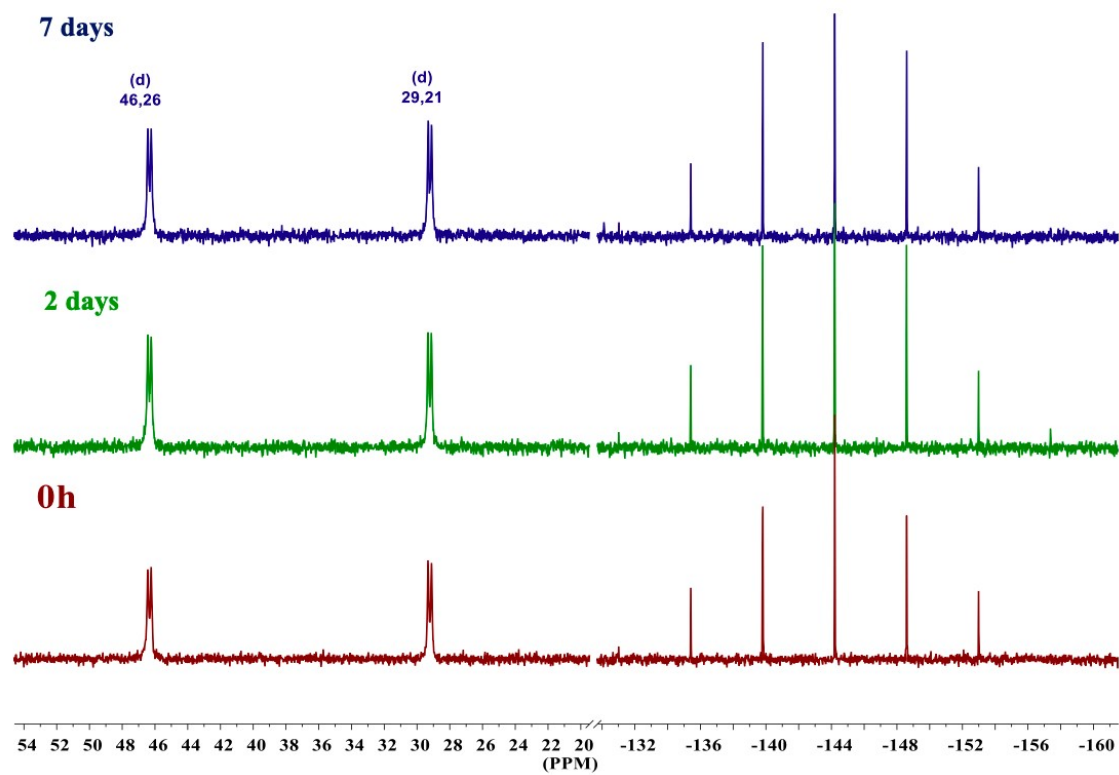

**Figure S29.**  $^{31}\text{P}\{^1\text{H}\}$  NMR spectra of complex (**1**) in DMSO/DMEM 3:1 (v/v) at different times and room temperature.



**Table S1.** Crystal data and structure refinement for complex (2)

|                                   |                                                                                                   |
|-----------------------------------|---------------------------------------------------------------------------------------------------|
| Empirical formula                 | [RuC <sub>54</sub> H <sub>45</sub> N <sub>4</sub> O <sub>3</sub> P <sub>2</sub> S]PF <sub>6</sub> |
| Formula weight                    | 1137.98                                                                                           |
| Temperature                       | 293(2) K                                                                                          |
| Wavelength                        | 0.71073 Å                                                                                         |
| Crystal system                    | Orthorhombic                                                                                      |
| Space group                       | Pbcn                                                                                              |
| Unit cell dimensions              | a = 19.3556(4) Å<br>b = 22.3068(4) Å<br>c = 23.0775(4) Å                                          |
| Volume                            | 9964.0(3) Å <sup>3</sup>                                                                          |
| Z                                 | 8                                                                                                 |
| Density (calculated)              | 1.517 Mg/m <sup>3</sup>                                                                           |
| Absorption coefficient            | 0.525 mm <sup>-1</sup>                                                                            |
| F(000)                            | 4640                                                                                              |
| Crystal size                      | 0.493 x 0.485 x 0.269 mm <sup>3</sup>                                                             |
| Theta range for data collection   | 2.747 to 25.999°.                                                                                 |
| Index ranges                      | -23 ≤ h ≤ 23, -27 ≤ k ≤ 27, -28 ≤ l ≤ 28                                                          |
| Reflections collected             | 194061                                                                                            |
| Independent reflections           | 9788 [R(int) = 0.0564]                                                                            |
| Completeness to theta = 25.242°   | 99.9 %                                                                                            |
| Refinement method                 | Full-matrix least-squares on F <sup>2</sup>                                                       |
| Data / restraints / parameters    | 9788 / 0 / 690                                                                                    |
| Goodness-of-fit on F <sup>2</sup> | 1.288                                                                                             |
| Final R indices [I > 2σ(I)]       | R1 = 0.0500, wR2 = 0.0961                                                                         |
| R indices (all data)              | R1 = 0.0796, wR2 = 0.1252                                                                         |
| Largest diff. peak and hole       | 0.623 and -0.795 e.Å <sup>-3</sup>                                                                |

**Table S2.** Selected bond lengths [ $\text{\AA}$ ] for complex (**2**)

---

|             |            |             |          |
|-------------|------------|-------------|----------|
| Ru(1)-O(1)  | 2.114(3)   | O(2)-C(3)   | 1.350(7) |
| Ru(1)-N(3)  | 2.116(4)   | O(2)-C(6)   | 1.373(7) |
| Ru(1)-N(4)  | 2.138(3)   | O(3)-C(212) | 1.386(6) |
| Ru(1)-P(1)  | 2.2958(11) | O(3)-C(112) | 1.387(5) |
| Ru(1)-P(2)  | 2.3476(11) | N(2)-C(2)   | 1.347(6) |
| Ru(1)-S(1)  | 2.3506(11) | N(2)-C(8)   | 1.448(7) |
| S(1)-C(2)   | 1.733(5)   | N(2)-C(7)   | 1.457(7) |
| P(2)-C(211) | 1.821(4)   | N(1)-C(1)   | 1.310(6) |
| P(2)-C(221) | 1.833(5)   | N(1)-C(2)   | 1.320(6) |
| P(2)-C(231) | 1.840(5)   | N(4)-C(18)  | 1.325(5) |
| P(1)-C(131) | 1.830(5)   | N(4)-C(14)  | 1.341(6) |
| P(1)-C(111) | 1.840(5)   | N(3)-C(9)   | 1.321(6) |
| P(1)-C(121) | 1.841(5)   | N(3)-C(13)  | 1.371(6) |
| O(1)-C(1)   | 1.264(5)   |             |          |

---
